# Supplementary material
Source: publisher figshare collection journal article supplement (https://aacr.figshare.com/articles/dataset/_/23668531)
Supplement: Supplementary file 1 [file 41536714]

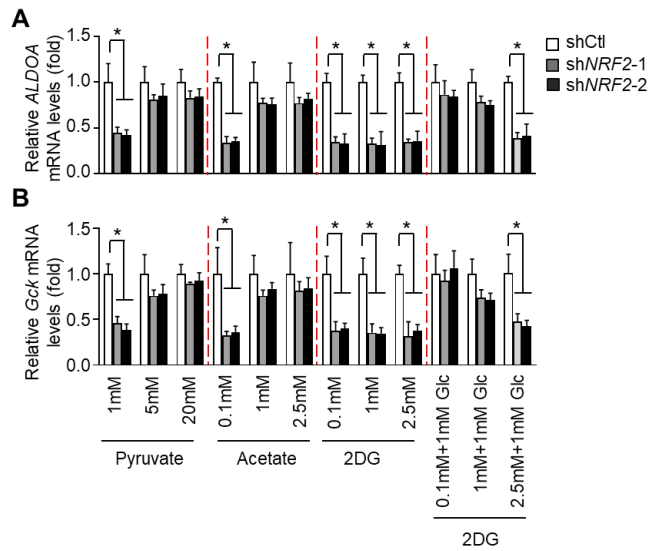

**Fig S9. ALDOA and Gck gene expression in glucose-deprived shNRF2 HepG2 cells after energy-refeeding.** Relative RNA levels of glycolysis gene GCK (A-C) and fatty acid metabolism gene ALDOA (D-F) in HepG2 cells after energy-refeeding from low to high concentrations of energy sources or antagonist Pyruvate (1mM, 5mM or 20 mM), acetate (0.1 mM, 1 mM or 2.5 mM), 2DG (0.1 mM, 1 mM or 2.5 mM) or Glucose+2DG (1 mM glucose plus 0.1 mM, 1 mM or 2.5 mM 2DG), respectively. Data represent mean  $\pm$  SD (n=3 independent experiments). \* $p < 0.05$ .
